# Supplementary material for: CoPc and CoPcF16 on gold: Site-specific charge-transfer processes
Source: publisher site journal article supplement (doi:10.3762/bjnano.5.61), 2014-04-25
Supplement: Additional file 1 [file 2190-4286-5-61-S1.pdf]

## Supporting Information

for

### CoPc and CoPcF<sub>16</sub> on gold: Site-specific charge-transfer processes

Fotini Petraki, Heiko Peisert\*, Johannes Uihlein, Umut Aygöl and Thomas Chassé

Address: Institute of Physical and Theoretical Chemistry, University of Tübingen, Auf der Morgenstelle 18, 72076 Tübingen, Germany

Email: Heiko Peisert - heiko.peisert@uni-tuebingen.de

\* Corresponding author

### Co 2p core-level photoemission spectra

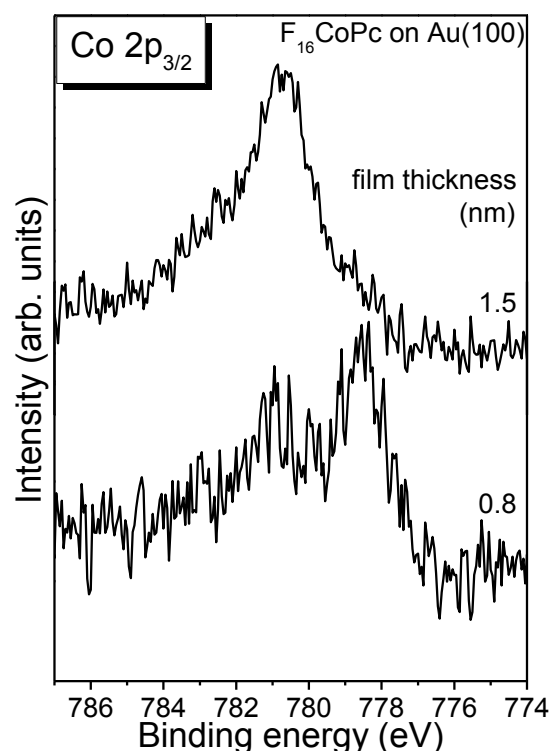

**Figure S1:** CoPcF<sub>16</sub>/Au(100): Co 2p core-level photoemission spectra taken at an excitation energy of 900 eV as a function of the CoPcF<sub>16</sub> film thickness.

Similar to CoPcF<sub>16</sub> on Au foil, the data show an additional feature at low coverage (0.8 nm, 1–2 monolayers), which can be attributed to an interfacial charge transfer from the substrate to the Co ion of CoPc.
